# Supplementary material for: The effect of light irradiation on a nitro-ruthenium porphyrin complex in the induced death of lung cancer cells in two- and three-dimensional cultures: Insights into the effect of nitric oxide
Source: Royal Society of Chemistry journal article supplement (doi:10.1039/d4dt00381k), 2024-01-01
Supplement: d4dt00381k1.pdf [file d4dt00381k1.pdf]

## Supplementary Material

### **The effect of light irradiation on nitro-ruthenium porphyrin complex in the induced death of lung cancer cells in two- and three-dimensional cultures: Insights into the effect of nitric oxide**

Amanda Blanque Becceneri<sup>1\*</sup>; Matheus Torelli Martin<sup>1</sup>, Angelica Ellen Graminha<sup>1,2</sup>; Márcia Regina Cominetti<sup>3</sup>; Peter C. Ford<sup>4</sup>; Roberto Santana da Silva<sup>1,4</sup>

<sup>1</sup> *Laboratory of Photochemistry and Bioinorganic Chemistry, School of Pharmaceutical Sciences of Ribeirão Preto, University of São Paulo (USP), Av. do Café, Vila Monte Alegre, Ribeirão Preto, São Paulo, 14040-903, Brazil.*

<sup>2</sup> *Institute of Chemistry, São Paulo State University., Av. Prof. Francisco Degni, 55, 14800-900, Araraquara, São Paulo, Brazil.*

<sup>3</sup> *Department of Gerontology, Federal University of São Carlos. Rod. Washington Luís, Km 235, São Carlos, São Paulo, 13565-905, Brazil.*

<sup>4</sup> *Department of Chemistry and Biochemistry, University of California, Santa Barbara, California 93110-9510, United States.*

\*Corresponding author  
E-mail address: amandabecc@usp.br

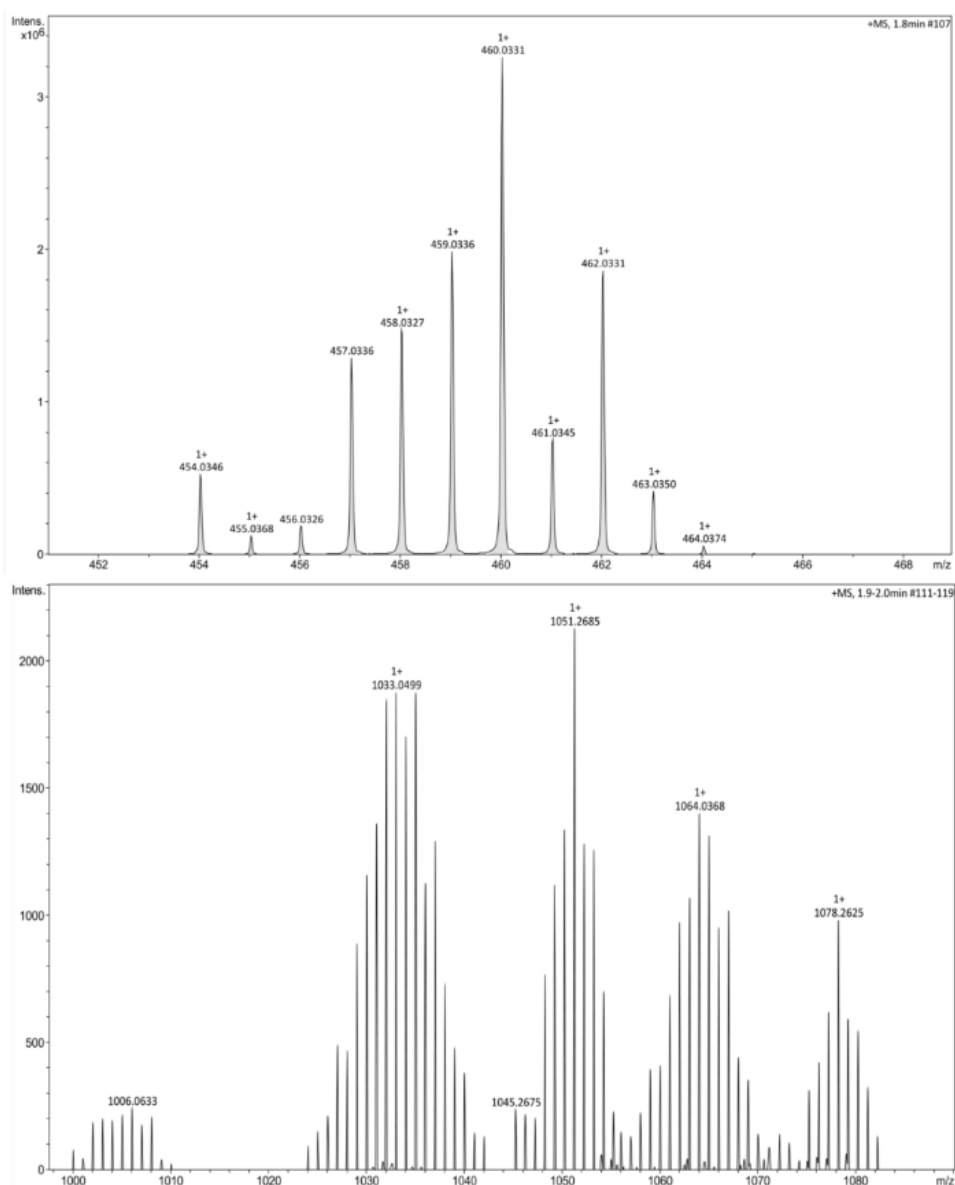

**Figure S1** – Mass spectra obtained by ESI-TOF revealing the isotopic profiles for the following identified fragments MS (ESI):  $m/z = 460.03$   $[\text{Ru}(\text{NO}_2)(\text{bpy})_2.\text{H}^+]$ ,  $1078.26$   $\{\text{TPyP}-[\text{Ru}(\text{NO}_2)(\text{bpy})_2.\text{H}^+]\}$ ,  $1064.03$   $\{\text{TPyP}-[\text{Ru}(\text{NO})(\text{bpy})_2.\text{H}^+]\}$ ,  $1051.26$   $\{\text{TPyP}-[\text{Ru}(\text{HO})(\text{bpy})_2.\text{H}^+]\}$ ,  $1033.04$   $\{\text{TPyP}-[\text{Ru}(\text{bpy})_2.2\text{H}^+]\}$ .

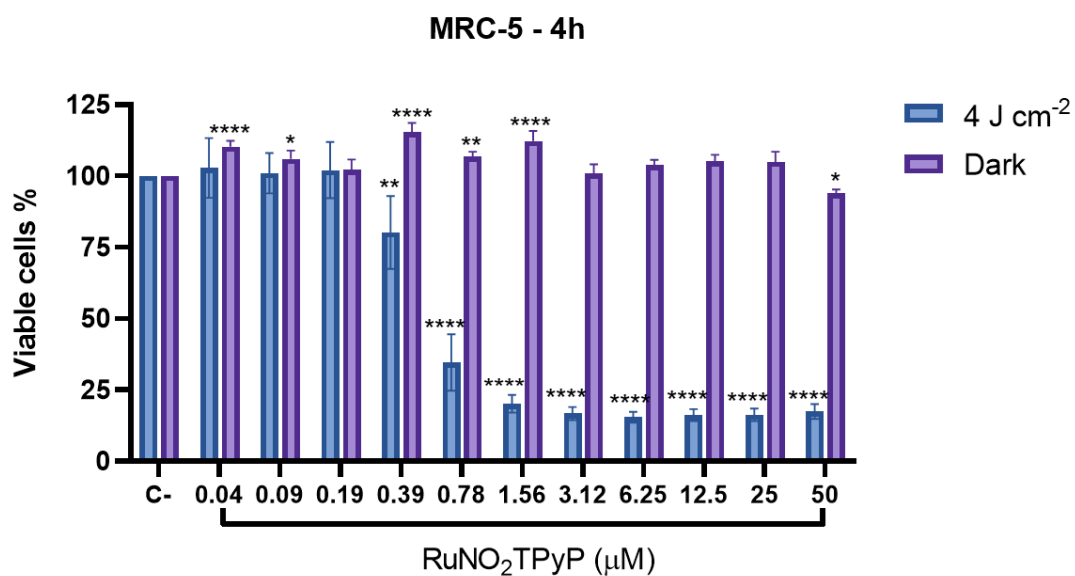

**Figure S2** – Effects of RuNO<sub>2</sub>TPyP complex on the viability of MRC-5 cells. Percentage of viable MRC-5 cells after 4 h treatment with complex RuNO<sub>2</sub>TPyP in the presence (415 nm, dose 4 J cm<sup>-2</sup>, represented in light blue) and absence of irradiation (dark, represented in light purple). The percentage results were compared with the negative control (C-). (\*p<0.05, \*\*p<0.01, \*\*\*p<0.001 and \*\*\*\*p<0.0001).
